# Supplementary material for: Miniature optoelectronic compound eye camera
Source: Springer Nature journal article supplement (doi:10.1038/s41467-022-33072-8), 2022-09-26
Supplement: 41467_2022_33072_MOESM2_ESM.pdf [file 41467_2022_33072_MOESM2_ESM.pdf]

## **Description of Additional Supplementary Files**

File name: Supplementary Movie 1

Description: The motion of a living beetle was recorded via a traditional camera and a  $\mu$ -CE camera. To shorten the playback time, videos of the motion process are played 3 times faster.

File name: Supplementary Movie 2

Description: A paramecium motion video was recorded by the  $\mu$ -CE camera, and the real-time trajectory reconstruction is performed at a rate of 24 frames per second.
